# Supplementary material for: Determinants of Outdoor Time in Children and Youth: A Systematic Review of Longitudinal and Intervention Studies
Source: MDPI journal article supplement (doi:10.3390/ijerph20021328), 2023-01-11
Supplement: s1 [file s1]

## Supplementary Material 2: search strategies for all databases, except MEDLINE<sup>1</sup>

### Figure S1 APA PsycINFO Search Strategy for Systematic Review

- 1 (boy\* or girl\* or child\* or toddler\* or adolescen\* or juvenile\* or teen or teens or teenage\* or youth or youths).tw.
- 2 (young adj 1 (people or person\*)).tw.
- 3 ((primary or elementary or high or secondary) adj1 school\*).tw.
- 4 (schoolchild\* or school child\* or schoolage or highschool\* or daycare or preschool\*).tw.
- 5 or/1-4
- 6 exp recreation areas/
- 7 ((outdoor\* or outside or park\*) adj5 (play\* or time or learn\* or educat\*)).tw.
- 8 or/6-7
- 9 (randomized or randomised).ab,ti.
- 10 randomly.ab,ti.
- 11 trial.ab,ti.
- 12 exp Program Evaluation/
- 13 (cohort\* or prospectiv\* or observ\* or longitudinal\* or quasi-longitudinal or (case\* and control\*)).tw.
- 14 or/9-13
- 15 5 and 8 and 14
- 16 limit 15 to (english or french or japanese or spanish)

Note: exp = used with a term to include all narrower terms; .ab, .ti, .pt, .tw = field codes for abstract, title, publication type, and text word, respectively; adj# = search for records with terms within # words of each other; \* after keyword indicates truncation (e.g., adolescen\* will retrieve “adolescent”, “adolescents”, “adolescence”, etc.)

<sup>1</sup> Note that the MEDLINE strategy is provided in Figure 1 (instead of the supplementary file).

# **Figure S2 CENTRAL Search Strategy for Systematic Review**

- 1 exp Child/
- 2 exp Adolescent/
- 3 exp Infant/
- 4 (boy\* or girl\* or child\* or toddler\* or adolescen\* or juvenile\* or teen or teens or teenage\* or youth or youths).tw.
- 5 (young adj1 (people or person\*)).tw.
- 6 ((primary or elementary or high or secondary) adj1 school\*).tw.
- 7 (schoolchild\* or school child\* or schoolage or highschool\* or daycare or preschool\*).tw.
- 8 or/1-7
- 9 exp Parks, Recreational/
- 10 ((outdoor\* or outside or park\*) adj5 (play\* or time or learn\* or educat\*)).tw.
- 11 or/9-10
- 12 randomized controlled trial.pt.
- 13 controlled clinical trial.pt.
- 14 (randomized or randomised).ab,ti.
- 15 randomly.ab,ti.
- 16 trial.ab,ti.
- 17 exp Case-Control Studies/
- 18 exp Cohort Studies/
- 19 exp Program Evaluation/
- 20 (cohort\* or prospectiv\* or observ\* or longitudinal\* or quasi-longitudinal or (case\* and control\*)).tw.
- 21 or/12-20
- 22 8 and 11 and 21
- 23 limit 22 to (english or french or japanese or spanish)

Note: exp = used with a term to include all narrower terms; .ab, .ti, .pt, .tw = field codes for abstract, title, publication type, and text word, respectively; adj# = search for records with terms within # words of each other; \* after keyword indicates truncation (e.g., adolescen\* will retrieve “adolescent”, “adolescents”, “adolescence”, etc.)

**Figure S3 CINAHL Search Strategy for Systematic Review**

S20 S7 AND S8 AND S18  
S19 S7 AND S8 AND S18  
S18 S9 OR S10 OR S11 OR S12 OR S13 OR S14 OR S15 OR S16 OR S17  
S17 (cohort\* or prospectiv\* or observ\* or longitudinal\* or quasi-longitudinal or (case\* and control\*))  
S16 (MH "Program Evaluation")  
S15 (MH "Prospective Studies+")  
S14 (MH "Case Control Studies+")  
S13 (trial)  
S12 (randomly)  
S11 (randomized or randomised)  
S10 (MH "Clinical Trials+")  
S9 (MH "Randomized Controlled Trials+")  
S8 ((outdoor\* or outside or park\*) N5 (play\* or time or learn\* or educat\*))  
S7 S1 OR S2 OR S3 OR S4 OR S5 OR S6  
S6 (schoolchild\* or school child\* or schoolage or highschool\* or daycare or preschool\*)  
S5 ((primary or elementary or high or secondary) N1 school\*)  
S4 (young N1 (people or person\*))  
S3 (boy\* or girl\* or child\* or toddler\* or adolescen\* or juvenile\* or teen or teens or teenage\* or youth or youths)  
S2 (MH "Adolescence+")  
S1 (MH "Child+")

Note: MH: searches both major and minor headings; N# = search for records with terms within # words of each other; \* after keyword indicates truncation (e.g., adolescen\* will retrieve "adolescent", "adolescents", "adolescence", etc.)

**Figure S4 ERIC Search Strategy for Systematic Review**

S20 S8 AND S11 AND S18  
S19 S8 AND S11 AND S18  
S18 S12 OR S13 OR S14 OR S15 OR S16 OR S17  
S17 (cohort\* or prospectiv\* or observ\* or longitudinal\* or quasi-longitudinal or (case\* and control\*))  
S16 DE “Program Evaluation”  
S15 trial  
S14 randomly  
S13 (randomized or randomized)  
S12 DE “Randomized Controlled Trials”  
S11 S9 OR S10  
S10 ((outdoor\* or outside or park\*) N5 (play\* or time or learn\* or educat\*))  
S9 DE “Parks”  
S8 S1 OR S2 OR S3 OR S4 OR S5 OR S6 OR S7  
S7 (schoolchild\* or school child\* or schoolage or highschool\* or daycare or preschool\*)  
S6 ((primary or elementary or high or secondary) N1 school\*)  
S5 (young N1 (people or person\*))  
S4 (boy\* or girl\* or child\* or toddler\* or adolescen\* or juvenile\* or teen or teens or teenage\* or youth or youths)  
S3 DE “Adolescents”  
S2 DE “Infants” OR DE “Neonates” or DE “Premature Infants”  
S1 DE “Children” OR DE “African American Children” OR DE “Grandchildren” OR DE “Hospitalized Children” OR DE “Latchkey Children” OR DE “Migrant Children” OR DE “Minority Group Children” OR DE “Preadolescents” OR DE “Young Children”

Note: DE: searches exact subject heading descriptors; N# = search for records with terms within # words of each other; \* after keyword indicates truncation (e.g., adolescen\* will retrieve “adolescent”, “adolescents”, “adolescence”, etc.)

**Figure S5 ProQuest Dissertations & Theses Search Strategy for Systematic Review**

|     |                                                                                                                      |
|-----|----------------------------------------------------------------------------------------------------------------------|
| S13 | S5 and S6 and S11                                                                                                    |
| S12 | S5 and S6 and S11                                                                                                    |
| S11 | S7 or S8 or S9 or S10                                                                                                |
| S10 | noft ((cohort* or prospectiv* or observ* or longitudinal* or quasi-longitudinal or (case* and control*)))            |
| S9  | noft ((trial))                                                                                                       |
| S8  | noft((randomly))                                                                                                     |
| S7  | noft ((randomized or randomised))                                                                                    |
| S6  | noft(((outdoor* or outside or park*) N/5 (play* or time or learn* or educat*)))                                      |
| S5  | S1 or S2 or S3 or S4                                                                                                 |
| S4  | noft((schoolchild* or school child* or schoolage or highschool* or daycare or preschool*))                           |
| S3  | noft(((primary or elementary or high or secondary) N/1 school*))                                                     |
| S2  | noft((young N/1(people or person*)))                                                                                 |
| S1  | noft(boy* or girl* or child* or toddler* or adolescen* or juvenile* or teen or teens or teenage* or youth or youths) |

Note: noft = search for the keyword in all fields in the full record, except the full text;  
N/# = search for records with terms within # words of each other; \* after keyword  
indicates truncation (e.g., adolescen\* will retrieve “adolescent”, “adolescents”,  
“adolescence”, etc.)

# **Figure S6 SocINDEX Search Strategy for Systematic Review**

S22 S8 AND S11 AND S20  
 S21 S8 AND S11 AND S20  
 S20 S12 OR S13 OR S14 OR S15 OR S16 OR S17 OR S18 OR S19  
 S19 cohort\* or prospectiv\* or observ\* or longitudinal\* or quasi-longitudinal or (case\* and control\*)program evaluation  
 S18 DE “COHORT analysis”  
 S17 DE “CASE-control method”  
 S16 trial  
 S15 randomly  
 S14 randomized or randomised  
 S13 DE “CLINICAL trials”  
 S12 DE “RANDOMIZED controlled trials”  
 S11 S9 OR S10  
 S10 (outdoor\* or outside or park\*) N5 (play\* or time or learn\* or educat\*)  
 S9 DE “PARKS” OR DE “NATIONAL parks & reserves” OR DE “URBAN parks”  
 S8 S1 OR S2 OR S3 OR S4 OR S5 OR S6 OR S7  
 S7 (schoolchild\* or school child\* or schoolage or highschool\* or daycare or preschool\*)  
 S6 (primary or elementary or high or secondary) N1 school\*  
 S5 young N1 (people or person\*)  
 S4 boy\* or girl\* or child\* or toddler\* or adolescen\* or juvenile\* or teen or teens or teenage\* or youth or youths  
 S3 DE “TEENAGERS” OR DE “ABUSED teenagers” OR DE “BLACK teenagers” OR DE “CELL phones & teenagers” OR DE “CHRISTIAN teenagers” OR DE “GIFTED teenagers” OR DE “HOMELESS teenagers” OR DE “INTERNET & teenagers” OR DE “JEWISH teenagers” OR DE “LGBTQ+ teenagers” OR DE “MASS media & teenagers” OR DE “MENTALLY ill teenagers” OR DE “MINORITY teenagers” OR DE “MOTION pictures & teenagers” OR DE “MUSIC & teenagers” OR DE “MUSLIM teenagers” OR DE “OVERWEIGHT teenagers” OR DE “POLICE services for juvenile” OR  
 S2 DE “INFANTS” OR DE “INFANT boys” OR DE “INFANT girls” OR DE “INFANTS with disabilities” OR DE “NEWBORN Infants” OR DE “PREMATURE infants”  
 S1 DE “CHILDREN” OR DE “ABUSED children” OR DE “ADOPTED children” OR DE “ADULT children” OR DE “ADULT children of alcoholics” OR DE “ADVERTISING & children” OR DE “AIDS & children” OR DE “ARTS & children” OR DE “BAHAI children” OR DE “BILINGUALISM in children” OR DE “BIRTH order” OR DE “BLACK children” OR DE “BOYS” OR DE “BUDDHIST children” OR DE “CHILD beauty pageant contestants” OR DE “CHILD development” OR DE “CHILD patients” OR DE “CHILD prostitutes” OR DE “CHILDREN & erotica” OR DE “CHILDREN &...

Note: DE: searches exact subject heading descriptors; N# = search for records with terms within # words of each other; \* after keyword indicates truncation (e.g., adolescen\* will retrieve “adolescent”, “adolescents”, “adolescence”, etc.)

**Figure S7 SPORTDiscus Search Strategy for Systematic Review**

S20 S7 AND S10 AND S18  
S19 S7 AND S10 AND S18  
S18 S11 OR S12 OR S13 OR S14 OR S15 OR S16 OR S17  
S17 (cohort\* or prospectiv\* or observ\* or longitudinal\* or quasi-longitudinal or (case\* and control\*))  
S16 DE "COHORT analysis"  
S15 DE "CASE-control method"  
S14 (trial)  
S13 (randomly)  
S12 (randomized or randomised)  
S11 DE "RANDOMIZED controlled trials"  
S10 S8 OR S9  
S9 ((outdoor\* or outside or park\*) N5 (play\* or time or learn\* or educat\*))  
S8 DE "PARKS" OR DE "AQUATIC parks & reserves" OR DE "NATIONAL parks & reserves" OR DE "SKATEBOARDING parks" OR DE "PLAYGROUNDS"  
S7 S1 OR S2 OR S3 OR S4 OR S5 OR S6  
S6 (schoolchild\* or school child\* or schoolage or highschool\* or daycare or preschool\*)  
S5 ((primary or elementary or high or secondary) N1 school\*)  
S4 (young N1 (people or person\*))  
S3 boy\* or girl\* or child\* or toddler\* or adolescen\* or juvenile\* or teen or teens or teenage\* or youth or youths)  
S2 DE "TEENAGERS" OR DE " OVERWEIGHT teenagers" OR DE "VIDEO games & teenagers"  
S1 DE "CHILDREN" OR DE "AIDS & children" OR DE "BOYS" OR DE "CHILD acrobats" OR DE "CHILD circus performers" OR DE "CHILD dancers" OR THE "CHILD development" OR DE "DANCE for children" OR DE "DEAFBLIND children" OR DE "GIRLS" OR DE "OUTDOOR recreation for children" OR DE "OVERWEIGHT children" OR DE "SCHOOL children" OR DE "SELF-defense for children" OR DE "VIDEO games & children"

Note: DE: searches exact subject heading descriptors; N# = search for records with terms within # words of each other; \* after keyword indicates truncation (e.g., adolescen\* will retrieve "adolescent", "adolescents", "adolescence", etc.)

**Figure S8 Web of Science Search Strategy for Systematic Review**

- S13 (#12) AND LANGUAGE: (English OR French OR Japanese OR Spanish)
- S12 #11 AND #6 AND #5
- S11 #10 OR #9 OR #8 OR #7
- S10 TS=(cohort\* or prospectiv\*or observ\* or longitudinal\* or quasi-longitudinal or (case\* and control\*) )
- S9 TS=(trial)
- S8 TS=(randomly)
- S7 TS=(randomized or randomised)
- S6 TS=((outdoor\* or outside or park\*) NEAR/5 (play\* or time or learn\* or educat\*) )
- S5 #4 OR #3 OR #2 OR #1
- S4 TS=(schoolchild\* or school child\* or schoolage or highschool\* or daycare or preschool\*)
- S3 TS=(primary or elementary or high or secondary) NEAR/1 school\*)
- S2 TS=(young NEAR/1(people or person\*) )
- S1 TS=(boy\* or girls\* or child\* or toddler\* or adolescen\* or juvenile\* or teen or teens or teenage\* or youth or youths)

Note: TS = search for topic in the following fields: title, abstract, author keywords, and Keywords Plus®; NEAR/# = search for records with terms within # words of each other; \* after keyword indicates truncation (e.g., adolescen\* will retrieve “adolescent”, “adolescents”, “adolescence”, etc.)
